# Supplementary material
Source: publisher site journal article supplement (https://www.dovepress.com/article/298390)
Supplement: Supplementary file 1 [file get_supplementary_file.php]

**Supplementary file**

**Interview guide**

- How do you counsel patients about physical activity or exercise?
- What are the challenges of physical activity counselling?
- What do you think about using eHealth technologies (eg mobile applications) for physical activity counselling?
- What types of technologies and technological methods are suitable for physical activity counselling in primary health care?
- What contents should be considered when developing and utilizing an eHealth tool for physical activity counselling in primary health care?
- What features do you recommend for an eHealth tool/application developed for physical activity counselling?
